# Supplementary material for: Characteristics of Long COVID: Cases from the First to the Fifth Wave in Greater Tokyo, Japan
Source: MDPI journal article supplement (doi:10.3390/jcm11216457), 2022-10-31
Supplement: s1 [file s1]

## Supplementary Materials

**Table S1.** Association between patients' characteristics and poor performance status defined as a performance status score of 6 or more (n=1,891).

|                                 | Crude |      |              |                      | Model 1 <sup>a</sup> |                      |
|---------------------------------|-------|------|--------------|----------------------|----------------------|----------------------|
|                                 | N     | %    | OR           | 95%CI                | OR                   | 95%CI                |
| Age (years)                     |       |      |              |                      |                      |                      |
| <15                             | 7     | 25.9 | 1.15         | 0.47, 2.78           | 1.29                 | 0.50, 3.29           |
| 15-19                           | 17    | 22.1 | 0.93         | 0.52, 1.66           | 0.97                 | 0.50, 1.87           |
| 20-29 (Ref)                     | 103   | 23.4 | Ref          |                      | Ref                  |                      |
| 30-39                           | 113   | 22.2 | 0.94         | 0.69, 1.27           | 1.18                 | 0.84, 1.66           |
| 40-49                           | 112   | 23.1 | 0.98         | 0.72, 1.33           | 1.19                 | 0.85, 1.68           |
| 50-59                           | 80    | 27.5 | 1.24         | 0.88, 1.74           | 1.22                 | 0.83, 1.77           |
| ≥60                             | 22    | 34.9 | 1.76         | 1.00, 3.08           | 1.96                 | 1.04, 3.68           |
| P for trend                     |       |      | 0.085        |                      | 0.096                |                      |
| Sex                             |       |      |              |                      |                      |                      |
| Male (Ref)                      | 152   | 20.0 | Ref          |                      | Ref                  |                      |
| Female                          | 302   | 26.8 | <b>1.47</b>  | <b>1.17, 1.83</b>    | 1.28                 | 0.999, 1.64          |
| Employment status               |       |      |              |                      |                      |                      |
| Working regular hours (Ref)     | 8     | 1.8  | Ref          |                      | Ref                  |                      |
| Having their work hours reduced | 29    | 10.8 | <b>6.66</b>  | <b>3.00, 14.80</b>   | <b>6.53</b>          | <b>2.94, 14.53</b>   |
| On leave, dismissed or retired  | 216   | 54.7 | <b>66.52</b> | <b>32.16, 137.58</b> | <b>65.28</b>         | <b>31.52, 135.23</b> |
| Not working                     | 37    | 23.6 | <b>17.00</b> | <b>7.71, 37.47</b>   | <b>17.00</b>         | <b>7.42, 38.93</b>   |
| Vaccination                     |       |      |              |                      |                      |                      |
| Not vaccinated (Ref)            | 439   | 24.0 | Ref          |                      | Ref                  |                      |
| Vaccinated                      | 15    | 25.4 | 1.08         | 0.60, 1.96           | 1.08                 | 0.56, 2.09           |

<sup>a</sup> In model 1, age, sex, employment status and vaccination were put into model simultaneously. Bold indicates p<0.05. OR, odds ratio; CI, confidence interval.
